# Supplementary material for: Garnet Geochemistry and Lu-Hf Geochronology of a Gold-Bearing Sillimanite-Garnet-Biotite Gneiss at the Borden Lake Belt
Source: MDPI journal article supplement (doi:10.3390/geosciences12050218), 2022-05-23
Supplement: s1 [file s1]

Archive with 1 entries (1 files):
- geosciences-1705598-supplementary.pdf
