# Supplementary figures and images for: Garnet Geochemistry and Lu-Hf Geochronology of a Gold-Bearing Sillimanite-Garnet-Biotite Gneiss at the Borden Lake Belt
Source: MDPI journal article supplement (doi:10.3390/geosciences12050218), 2022-05-23

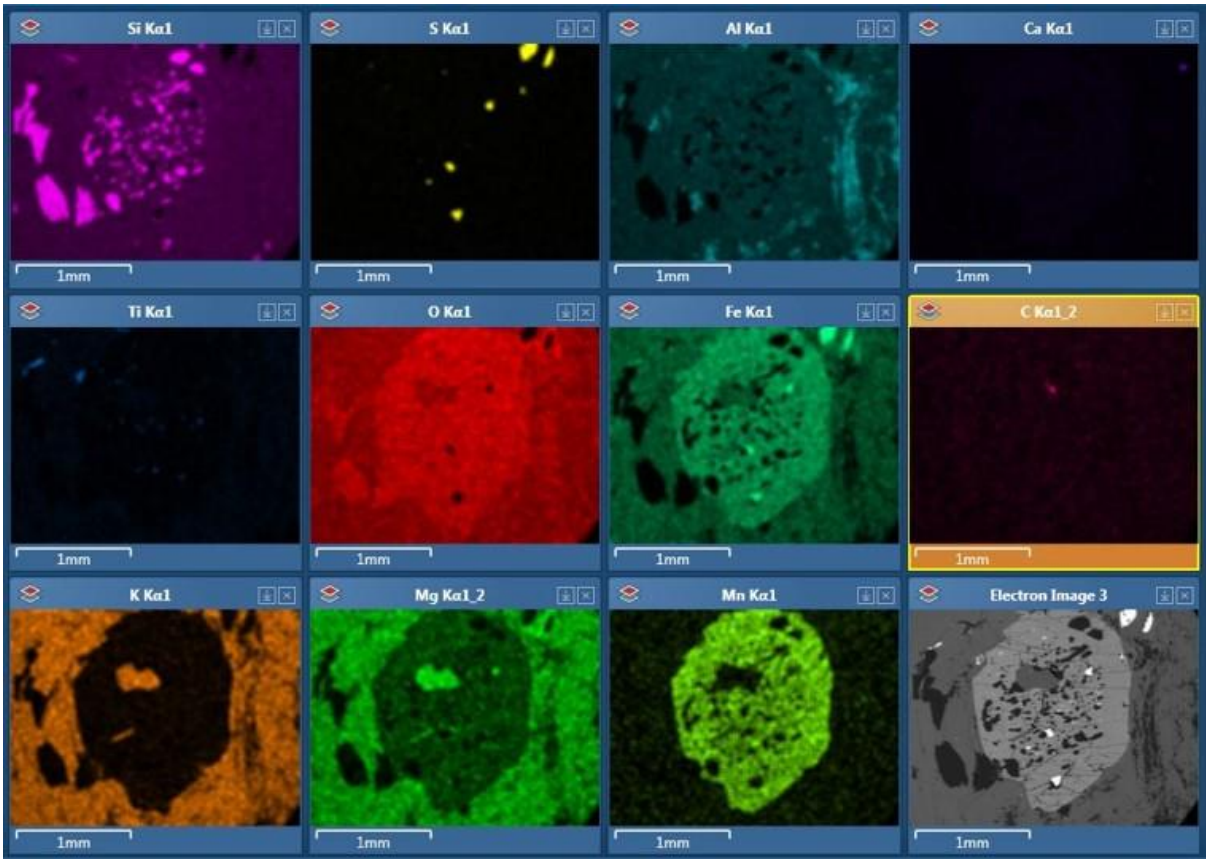

**Figure S1.** Selected elemental EDS maps for a garnet from sample FD 01340.

Supplement: s1 [file s1]
